# Supplementary material
Source: MDPI journal article supplement (https://www.mdpi.com/2624-5175/2/4/37)
Supplement: s1 [file s1]

**Table S1.** Light exposure per condition in the hours (18:00–22:45) preceding the night shifts.

|                                     | <b>Short-Wavelength Narrow-Bandwidth Light (<i>n</i> = 27)</b> | <b>Long-Wavelength Narrow-Bandwidth Light (<i>n</i> = 28)</b> | <i>p</i> <sup>a</sup> |
|-------------------------------------|----------------------------------------------------------------|---------------------------------------------------------------|-----------------------|
|                                     | <b>Mean (SD)</b>                                               | <b>Mean (SD)</b>                                              |                       |
| Total white light exposure (lx/min) | 17.63 (13.47)                                                  | 19.65 (22.19)                                                 | 0.320                 |
| Maximum white light exposure (lx)   | 341.22 (212.19)                                                | 431.42 (367.23)                                               | 0.495                 |

Note. Light exposure levels assessed with wrist-actigraphy (Actiwatch 2 or Actiwatch Spectrum). <sup>a</sup> Analyzed using Wilcoxon signed ranks test.
